1 **Pharmacodynamic model of the dynamic response of *Pseudomonas aeruginosa* biofilms to**  
2 **drug treatments**

3

4 Swarnima Roychowdhury<sup>1</sup>, Charles M. Roth<sup>1,2\*</sup>

5

6 <sup>1</sup>Department of Biomedical Engineering, Rutgers, The State University of New Jersey,  
7 Piscataway, NJ 08854, USA

8 <sup>2</sup>Department of Chemical and Biochemical Engineering, Rutgers, The State University of New  
9 Jersey, Piscataway, NJ 08854, USA

10 \*Corresponding author:

11 Email: [cmroth@rutgers.edu](mailto:cmroth@rutgers.edu) (CMR)

## 1 **Abstract**

2 Chronic infection by gram-negative bacteria such as *Pseudomonas aeruginosa* is a leading cause  
3 of morbidity and mortality in cystic fibrosis patients in whom overabundant mucus and the  
4 formation of bacterial biofilms pose barriers to drug delivery and effectiveness. Accurate  
5 pharmacokinetic-pharmacodynamic (PK-PD) models of biofilm treatment could be used to guide  
6 formulation and administration strategies to better control bacterial lung infections. To this end,  
7 we have developed a detailed pharmacodynamic model of *P. aeruginosa* treatment with the front-  
8 line antibiotics, tobramycin and colistin, and validated it on a detailed dataset of killing dynamics.  
9 A compartmental model structure was developed in which the key features are diffusion of drug  
10 through a boundary layer to the bacteria, concentration dependent interactions with bacteria, and  
11 passage of the bacteria through successive transit states before death. The number of transit states  
12 employed was greater for tobramycin, which is a ribosomal inhibitor, than for colistin, which  
13 disrupts bacterial membranes. For both drugs, the experimentally observed delay in killing of  
14 bacteria following drug exposure was replicated and was consistent with the diffusion time, though  
15 for tobramycin, there was an additional delay reflected in the model by passage through the transit  
16 states. For each drug, the PD model with a single set of parameters described data across a ten-  
17 fold range of concentrations and for both continuous and transient exposure protocols.  
18 Furthermore, the parameters fit for each drug individually were used to model the response of  
19 biofilms to combined treatment with tobramycin and colistin. The ability to predict drug response  
20 over a range of administration protocols allows this PD model to be integrated with PK  
21 descriptions to describe in vivo antibiotic response dynamics and to predict drug delivery strategies  
22 for improved control of bacterial lung infections.

## 23 **Author Summary**

24 Biofilms are self-assembling bacterial communities that adhere to a surface and encase themselves  
25 in a protective coating. Biofilm infections are notoriously difficult to treat with conventional  
26 antibiotic administrations. To understand better the dynamics of bacterial biofilm killing in  
27 response to antibiotic treatment, we developed a mathematical model that integrates several  
28 features: drug diffusion through a boundary layer that includes the biofilm casing, concentration

29 dependent cell damage, and passage of the cell through damaged states to eventual death. We  
30 validated the model by comparison with an extensive published dataset of biofilm response to  
31 treatment with the antibiotics, tobramycin and colistin. The model fits to these datasets were able  
32 to capture the observed trends for several antibiotic administration protocols, with model  
33 parameters reflecting the differences in mechanism of action between the two drugs. This validated  
34 model can be integrated with pharmacokinetic descriptions of drug distribution in the body over  
35 time to predict dosing and administration protocols for preclinical and clinical studies.

## 36 **Introduction**

37 Bacterial biofilms contain cells that adhere to each other to produce a colony of microorganisms,  
38 which is additionally adherent to a surface that may be living or nonliving [1]. The cells within the  
39 biofilm secrete an extracellular polymeric substance (EPS) that encases and protects this colony  
40 from host responses and potential drug treatments [2]. Biofilms occur on a wide range of artificial  
41 and natural surfaces. Biofilm formation has been found in a variety of anatomic settings including  
42 wounds, the ear, and lungs; it accounts for greater than 80% of human microbial infections [3].

43 In some cases, altered pathophysiology may provide a favorable setting for biofilm formation,  
44 such as the altered mucus composition in patients with cystic fibrosis (CF). Mucin, the  
45 glycoprotein responsible for viscoelastic properties of mucus, is overproduced, and abnormal  
46 glycosylation patterns are observed within CF patients [4]. The mucus-filled environment gives  
47 rise to a breeding ground of bacterial development. Chronic infection by *Pseudomonas*  
48 *aeruginosa*, a gram-negative bacterium notorious for its antibiotic resistance due to biofilm  
49 formation, is common within 80% of CF patients [3]. Medical devices and instruments may also  
50 be contaminated with *P. aeruginosa*; thus, hospital-acquired infections are not uncommon [5].  
51 Patients infected with *P. aeruginosa* are given antibiotic treatments, such as tobramycin and  
52 colistin, that are only effective in high doses to treat biofilms. These high dosages, in turn, induce  
53 systemic toxicities [6], and their prolonged use can lead to antibiotic resistance [7].

54 Pharmacokinetic-pharmacodynamic (PK-PD) models are frequently used as tools to design dosing  
55 and administration protocols and as frameworks to interpret experimental results in preclinical  
56 studies. For antibiotic treatments of infection, this is often implemented using static parameters,

57 such as minimum inhibitory concentration (MIC) for the pharmacodynamics and maximum drug  
58 concentration ( $C_{\max}$ ) or drug area under the curve (AUC) for the pharmacokinetics [8]. The  
59 physical barriers posed and community nature of a bacterial biofilm are such that it may be  
60 necessary to incorporate additional factors, such as the dynamics of drug transport and delayed,  
61 cooperative effects of drugs on biofilm bacteria in order to better describe drug response. Better  
62 experimental quantification of the dynamics of biofilm response to various drug treatments and  
63 their incorporation into pharmacodynamic (PD) models are crucial in understanding and  
64 incorporating the concentration dependent and dynamic effects involved in overcoming biofilm  
65 infections. For example, recent developments in the application of confocal laser scanning  
66 microscopy with flow chambers has enabled monitoring of the real-time killing of bacterial  
67 biofilms [9-11].

68 In the present work, a rich data set was used to validate a novel PD model for the killing of *P.*  
69 *aeruginosa* in biofilms by tobramycin and colistin. The proposed model incorporates three  
70 essential components: drug diffusion to the biofilm, nonlinear drug concentration effects on  
71 cellular damage, and a passage through multiple transit states by which the cells eventually become  
72 nonviable. This model was applied to various drug administration experiments that reflect the  
73 dynamic nature of biofilm as well as the cellular mechanisms involved in response to the drug.  
74 Specifically, the model was based on experiments in which *P. aeruginosa* biofilms were exposed  
75 to varying concentrations of drugs. It was validated in its ability to capture the dynamics of killing  
76 in response to transient exposure to one drug and continuous exposure to drug combinations.

## 77 **Methods**

### 78 **Experimental dataset**

79 A pharmacodynamic model, which captures the effects of drug concentration, drug diffusion, and  
80 cell transit through several states ultimately leading to cell death, was developed to describe  
81 previously reported data regarding tobramycin and colistin treatment of *Pseudomonas aeruginosa*  
82 biofilms in a well-defined flow cell[9]. In the experiments, biofilm populations were established  
83 for 48 hours under flow. Subsequently, the biofilms were provided continuous or transient  
84 treatment of drug using the flow cell system, and data were collected continuously for up to 24

85 hours. The transit time of the drug within the tube was approximately 90 minutes, which was  
86 accounted for in our model by subtracting 1.5 hours from the raw data. Propidium iodide (PI) dye  
87 was included in the flow solution to stain the nonviable biomass, and the resulting fluorescence  
88 was recorded by automated microscopy and normalized to the maximum fluorescence intensity  
89 recorded. As a result, the experimentally reported quantity to which model predictions were  
90 compared is the “Relative Biovolume,” representing the normalized values of dead biovolume.

## 91 **Pharmacodynamic model**

92 In the proposed pharmacodynamic model (Figure 1), exposure to drug induces healthy biofilm  
93 cells (B) to enter and progress through one or more transit states ( $D_1, D_2, \dots$ ) in which the cell  
94 membrane integrity is maintained (i.e., they do not stain with propidium iodide) but the cells are  
95 no longer able to divide. Progression from the last transit state produces dead cells (X),  
96 corresponding experimentally to nonviable biovolume. Mass balances were used to derive kinetic  
97 equations describing the populations of healthy biofilm cells, the respective transit compartments,  
98 and dead cells. For tobramycin administration, the number of transit compartments was determined  
99 by optimization to be five, leading to the following set of balance equations. Colistin  
100 administration followed the same model structure; however, there was only one transit  
101 compartment as opposed to five.

$$\frac{dB^*}{dt} = B^* \cdot [\mu \cdot (1 - B^* - D_1^* - D_2^* - D_3^* - D_4^* - D_5^* - X^*) - k_s(\alpha, \beta)C_0] \quad (1)$$

$$\frac{dD_1^*}{dt} = k_s(\alpha, \beta)C_0 \cdot B^* - k_t \cdot D_1^* \quad (2)$$

$$\frac{dD_2^*}{dt} = k_t \cdot (D_1^* - D_2^*) \quad (3)$$

$$\frac{dD_3^*}{dt} = k_t \cdot (D_2^* - D_3^*) \quad (4)$$

$$\frac{dD_4^*}{dt} = k_t \cdot (D_3^* - D_4^*) \quad (5)$$

$$\frac{dD_5^*}{dt} = k_t \cdot (D_4^* - D_5^*) \quad (6)$$

$$\frac{dX^*}{dt} = k_t \cdot D_5^* \quad (7)$$

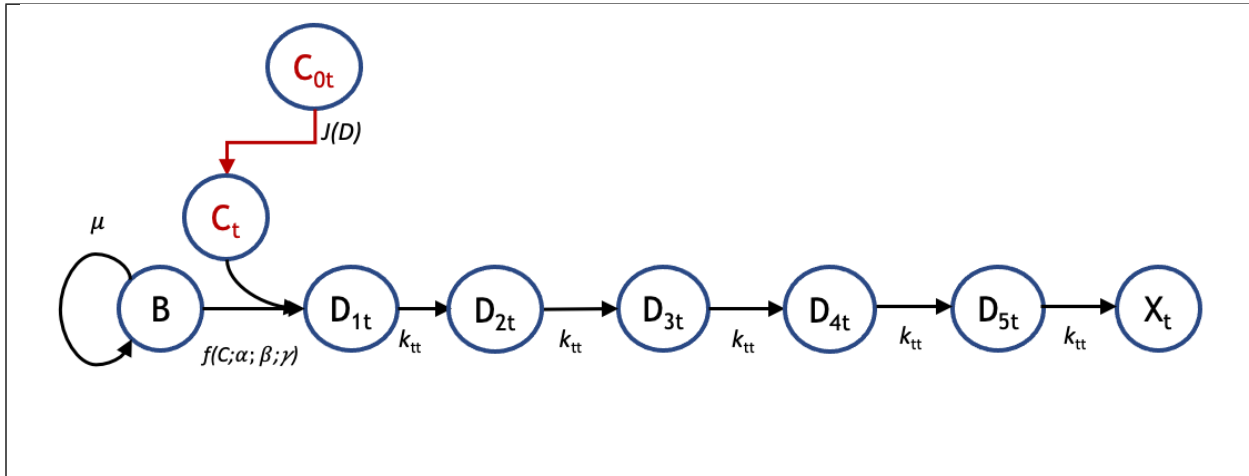

**Fig 1. Pharmacodynamic model structure for tobramycin.** The pharmacodynamic model for response to tobramycin (subscript ‘t’) tracks the transit of biofilm cells going from a viable (B) to nonviable state ( $X_t$ ) following administration of tobramycin at bulk concentration  $C_{0t}$ . There is a flux,  $J(D)$  of drug from the bulk to the biofilm cells, where the local concentration is  $C_t$ . For tobramycin, there are five transit compartments ( $D_{1t}$ ,  $D_{2t}$ ,  $D_{3t}$ ,  $D_{4t}$  and  $D_{5t}$ ) mediating the cellular response to drug. Growth is governed by a specific growth rate,  $\mu$ , the coupled diffusion and pharmacodynamic response are subject to parameters  $\alpha$ ,  $\beta$ , and  $\gamma$ , and the transit rate to subsequent compartments is given by  $k_{tt}$ .

102 In the above equations, the values for each compartment were normalized, as indicated by the  
 103 asterisks, to the maximum biovolume observed in accordance with the experimental data [9]. It is  
 104 assumed that all of the cells start in the healthy biofilm state, from which they can proliferate with  
 105 a specific growth rate ( $\mu$ ) that is modified with a capacity constraint term (Equation 1). The rate  
 106 of healthy cell entry into the transit rates is given in terms of a rate constant,  $k_s$ , and the bulk  
 107 concentration,  $C_0$ , raised to a cooperativity factor,  $\gamma$  (Equation 2). The rate constant is proportional  
 108 to the diffusive flux (SI Appendix) and can be expressed in terms of two model parameters,  $\alpha$  and  
 109  $\beta$ , each of which is a grouping of physical constants, to give:

$$k_s = \alpha \left[ 1 + 2 \sum_{n=1}^{\infty} (-1)^n e^{-n^2 \beta t} \right] \quad (8)$$

110 Biofilm cells affected by tobramycin eventually progress through five compartmental transit states  
111 (Equations 2-6) at a rate of  $k_t$  in which they become progressively less viable than the previous  
112 state. In the final compartment ( $X^*$ ), the biofilm cells are nonviable (dead). It is this quantity that  
113 can be compared with the measured nonviable biovolume.

114 The coupled set of ordinary differential equations (1) – (7) was solved using an ode45 solver in  
115 MATLAB where the initial relative density of the biofilm state was set to 0.81 for the tobramycin  
116 treatment and 0.89 for the colistin treatment, and the rest of the compartments started with no  
117 biovolume. For each drug (tobramycin and colistin), five adjustable model parameters ( $\mu$ ,  $f_c$ ,  $k_t$ ,  $\alpha$   
118 and  $\beta$ ) were fit to the composite experimental data [9] across varying respective concentrations  
119 and time courses of 24 hours. An error function was first created to evaluate the squared difference  
120 between the output of the model for a given set of parameters and the given data at a specific  
121 timepoint. This function was then minimized using the MATLAB implementation of genetic  
122 algorithm (ga), which produced the desired parameter values. The initial condition was essentially  
123 an extra parameter within the model. To find these values for each respective drug, values ranging  
124 between 0.70 and 0.95 were tested, and the error from the data and model output were compared.  
125 The initial concentration producing the least error was then used.

## 126 Results

127 A detailed pharmacodynamic model was proposed to describe the dynamic response of  
128 *Pseudomonas aeruginosa* to the antibiotics, tobramycin and colistin (Fig 1). The available dataset  
129 used to validate this model consists of the amount of dead biofilm (relative biovolume) as a  
130 function of time for several different biofilm concentrations for two different treatment protocols  
131 (tobramycin and colistin). In the proposed model, the drug first must diffuse through a boundary  
132 layer to get to the biofilm. When the drug reaches the biofilm, the biofilm cells go through a  
133 progression of transit compartments, the number of which is specific to and reflects the mechanism  
134 of action of the drug. Progression through the transit compartments is irreversible; consequently,

135 the cells ultimately die after passing through them. The model was fit to continuous-time data for  
136 the killing of *P. aeruginosa* in a flow-cell chamber [9].

137 The model was first tested on data for *P. aeruginosa* treated with tobramycin (TOB). The  
138 mechanism of action for tobramycin involves binding to the 30S ribosomal unit, thereby inhibiting  
139 protein synthesis, which gradually incapacitates the bacterium and ultimately induces cell death  
140 [12]. This is a prolonged process, which was modeled using five transit compartments, as described  
141 in the Methods. At the TOB 20  $\mu\text{g/mL}$  concentration, experimentally, there is a delay of  
142 approximately 5.5 hours between drug exposure (with the dead volume of the system already taken  
143 into account) and the emergence of nonviable biovolume, which subsequently increases rapidly  
144 (Fig 2). This behavior is captured by the model following a continuous treatment of tobramycin  
145 for 24 hours. The time required for the drug to diffuse to the biofilm is seen within the flat region  
146 of the graph, and as the cells progress through the transit compartments, they are still viable until  
147 death in the  $X^*$  compartment. After the composite time for drug diffusion and cellular  
148 compartment transit, there is a rapid increase in the number of dead cells observed experimentally  
149 and predicted by the model. For the other studied concentrations of tobramycin, 5 and 50  $\mu\text{g/mL}$   
150 (not shown), the proposed model shows the same pattern of delay, progression through the transit  
151 compartments, and increase in the dead biovolume population, all of which are consistent with the  
152 experimental results [9].



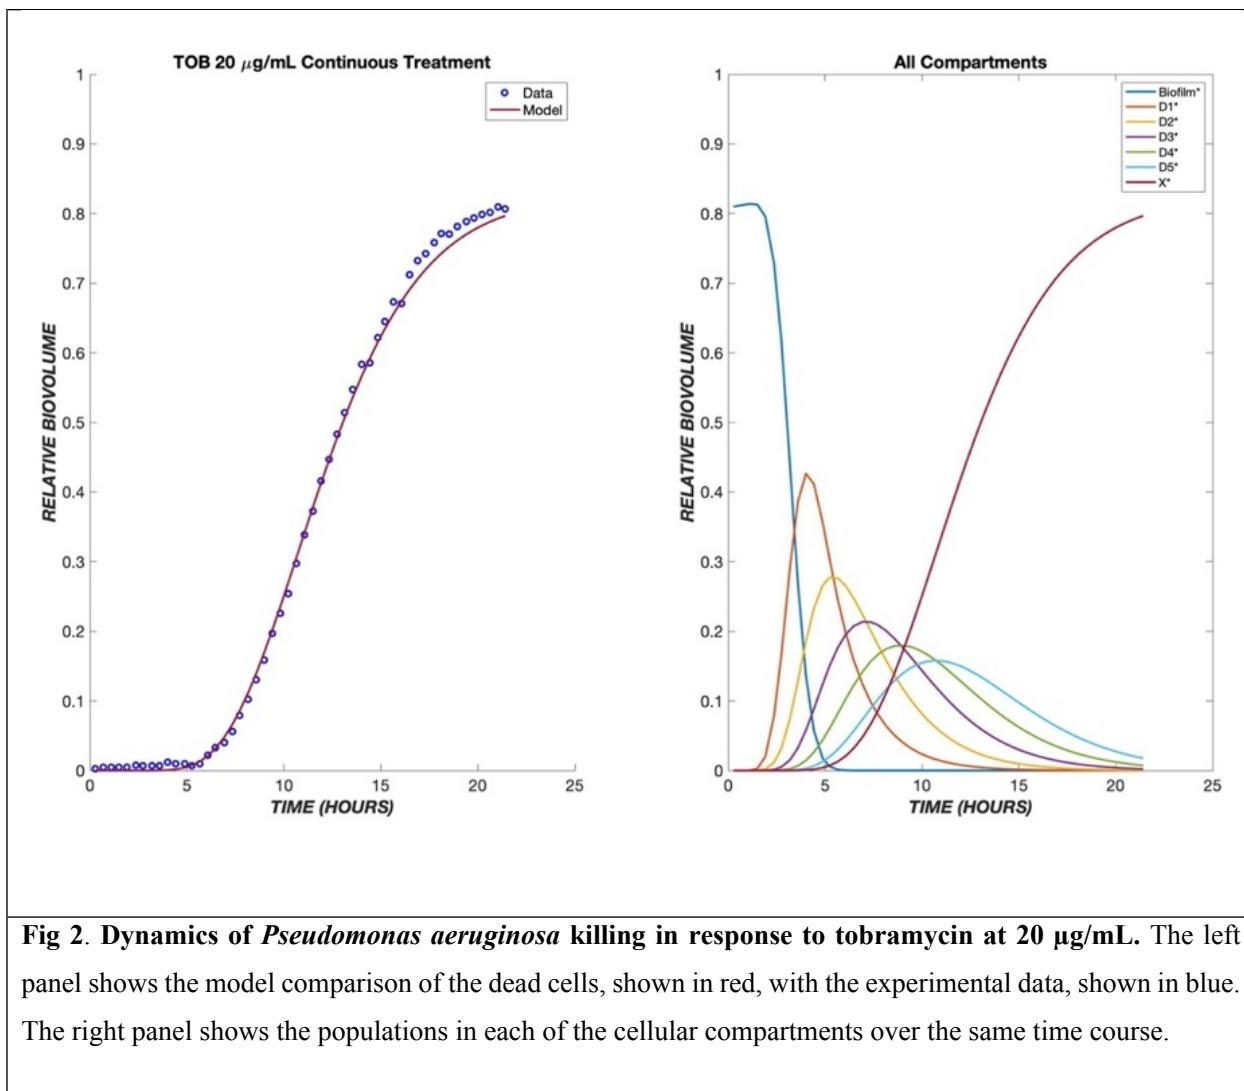

153

154 A useful pharmacodynamic model should be able to capture not only the dynamics, but also the  
155 concentration (dose) dependence of response. To this end, the model's parameters were fit to the  
156 ensemble data of 5, 20, and 50 µg/mL tobramycin exposure to produce one set of fit parameters  
157 (Table 1). This single set of parameters successfully describes the dynamics of cell killing for the  
158 concentration range of 5 - 50 µg/mL (Fig 3). The dependence of the lag time before onset of dead  
159 biovolume is consistent with the drug diffusion aspect of the model. Delay due to diffusion is seen  
160 for all drug concentrations, and it is amplified for lower concentrations. Because the diffusive flux  
161 of drug to the biofilm cells is directly proportional to the concentration driving force, less delay  
162 and higher dead biovolume concentrations are observed at shorter times for greater drug

163 concentrations. Consequently, tobramycin concentrations of 20 and 50  $\mu\text{g}/\text{mL}$  yield shorter lag  
 164 times as compared to 5  $\mu\text{g}/\text{mL}$  (Fig 3).

165

**Table 1. Pharmacodynamic model parameters.**

| Parameter | Description                                    | Units                                              | TOB Value | CST Value |
|-----------|------------------------------------------------|----------------------------------------------------|-----------|-----------|
| $\mu_B$   | Growth rate of biofilm population              | $\text{h}^{-1}$                                    | 0.0321    | 0.0001    |
| $\alpha$  | Rate constant for drug effect on biofilm cells | $(\mu\text{g}/\text{mL})^{\gamma-1} \text{h}^{-1}$ | 0.0002    | 0.0082    |
| $\beta$   | Normalized drug diffusivity                    | $\text{h}^{-1}$                                    | 0.2088    | 0.3986    |
| $\gamma$  | Cooperativity in drug effect on biofilm        |                                                    | 3.5330    | 4.4313    |
| $k_t$     | Intercompartmental transit rate of drug        | $\text{h}^{-1}$                                    | 0.5424    | 1.8924    |

166

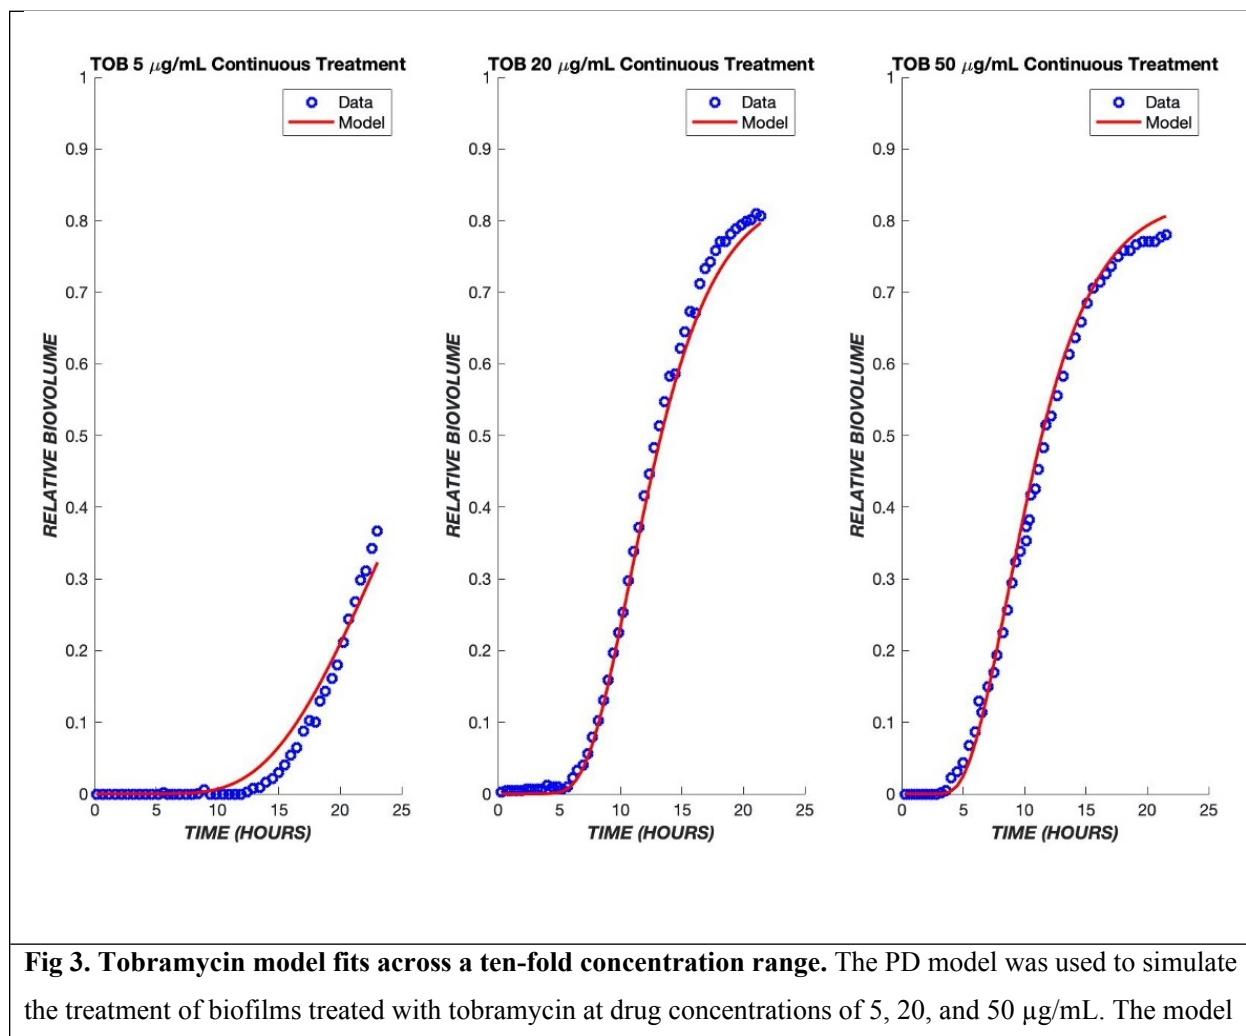

**Fig 3. Tobramycin model fits across a ten-fold concentration range.** The PD model was used to simulate the treatment of biofilms treated with tobramycin at drug concentrations of 5, 20, and 50  $\mu\text{g}/\text{mL}$ . The model

was fit to the ensemble data of all three concentrations. The experimental data are shown in blue, and the model is shown in red.

167

168 A key application of a pharmacodynamic model is its use to predict the response to varying drug  
169 administration protocols. Experimental data are available for the response of *P. aeruginosa* to a  
170 transient exposure to tobramycin, where the drug is administered for the first four hours and then  
171 turned off for the remaining twenty hours. The pharmacodynamic model predicts that drug effects  
172 will continue to be observed after removal of drug from the bulk, due to continued flux of  
173 remaining drug through the boundary layer and continued progression of cells through the transit  
174 compartments. As a result, a sharp increase in dead cell biovolume is predicted by the model and  
175 observed experimentally during the period from 5-20 hours after initial exposure, i.e., after the  
176 drug was turned off (Fig 4). At the higher concentrations of 20 and 50  $\mu\text{g}/\text{mL}$ , regrowth was  
177 observed in the experimental model about 12 hours after the drug administration ceased. Only at  
178 the lowest TOB concentration of 5  $\mu\text{g}/\text{mL}$  was there a reduction in killing in the transient exposure  
179 experiment as compared to continuous exposure. This behavior is explained by the model as being  
180 due to an insufficient amount of drug having diffused into the boundary layer during the four hours  
181 of drug exposure (Fig 4).

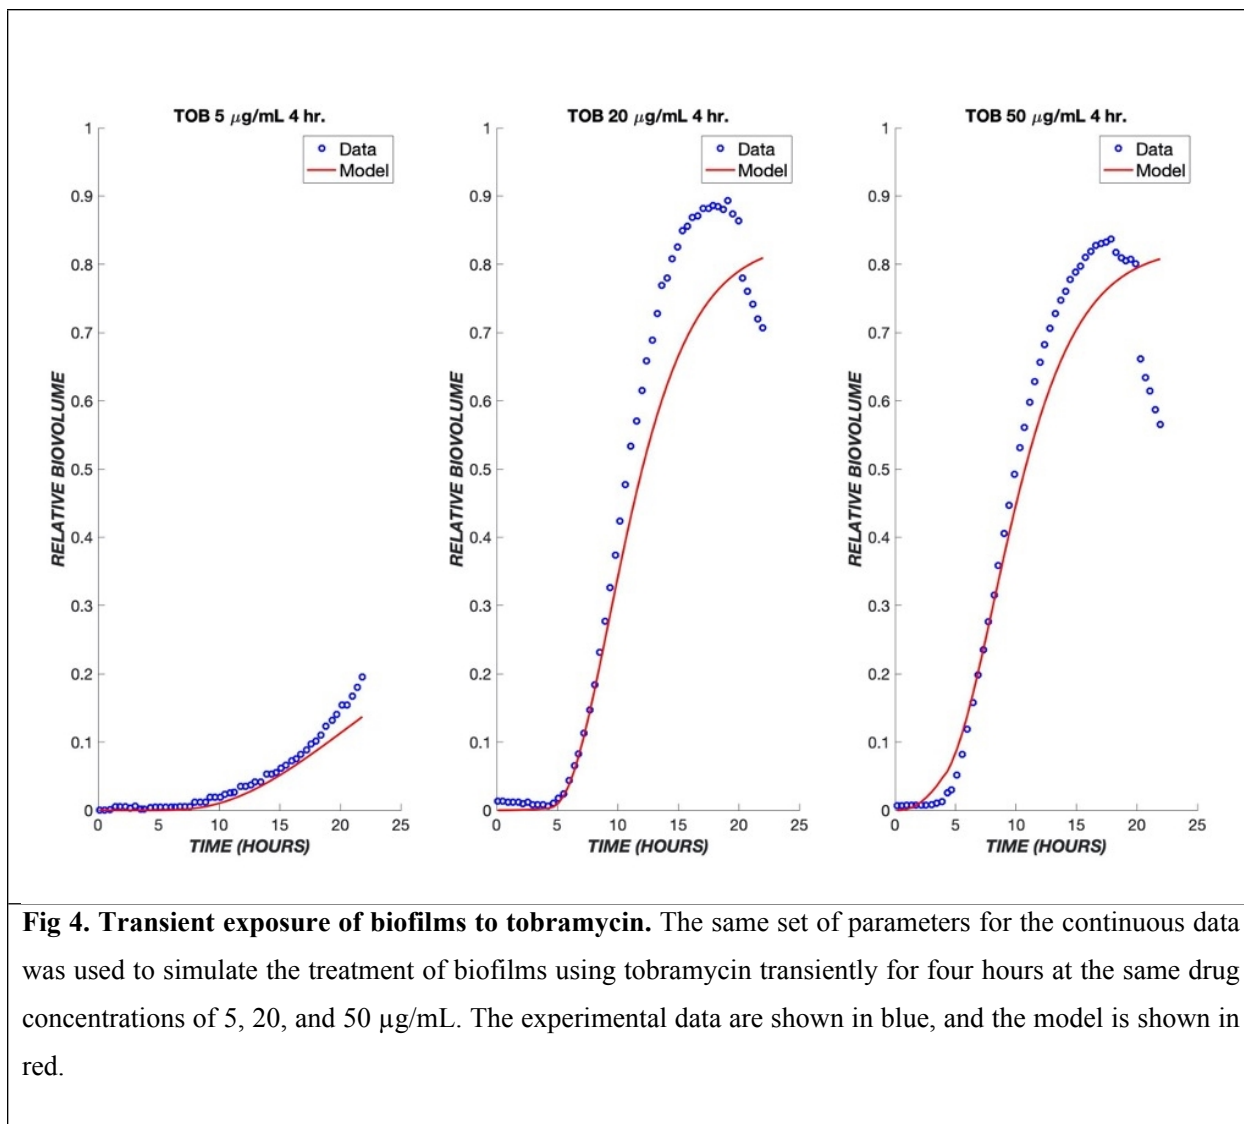

182

183 Experimental data on the treatment of *P. aeruginosa* in the same flow system are available for  
184 colistin, whose mechanism of action provides a contrast to that of tobramycin. Colistin is a  
185 lipopeptide which binds to phospholipids found on the membrane of the cells and replaces cations  
186 [13]. This induces cell rupture and leakage of the inner contents of the cell, leading to death.  
187 Because this drug has a more rapid mode of killing than tobramycin, the pharmacodynamic model  
188 was modified to contain only one transit compartment (Fig 5A), such that the progression of cells  
189 from the exposure to the drug to cell death is more rapid than for tobramycin. Analogously to  
190 tobramycin, we fit data for multiple concentrations of colistin (CST) into one set of parameters

191 and used these to model various concentrations of colistin administered continuously over a period  
192 of twelve hours.

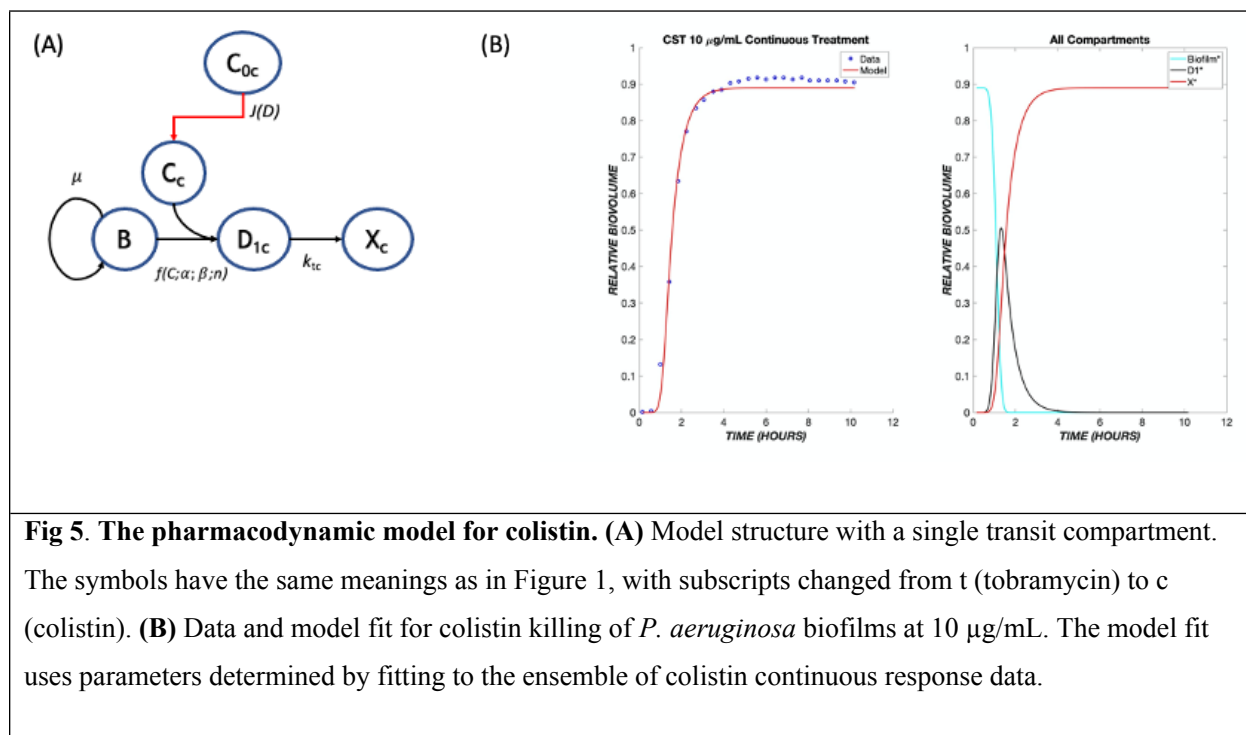

**Fig 5. The pharmacodynamic model for colistin.** (A) Model structure with a single transit compartment. The symbols have the same meanings as in Figure 1, with subscripts changed from t (tobramycin) to c (colistin). (B) Data and model fit for colistin killing of *P. aeruginosa* biofilms at 10  $\mu\text{g/mL}$ . The model fit uses parameters determined by fitting to the ensemble of colistin continuous response data.

193

194 As seen with tobramycin, a delay is observed in the response to colistin due to the time required  
195 for diffusion through the boundary layer (Fig 5B). However, the delay is shorter due to the  
196 existence of only one transit compartment and more rapid transit throughout. As with  
197 tobramycin, a single set of parameters accurately describes the ensemble of data over the tested  
198 concentration range (Fig 6). These same parameters were used when applying the model to a  
199 transient exposure to colistin, where the drug was administered for the first four hours and shut  
200 off for the remaining time (Fig 7). The same trend was seen as in the continuous treatment,  
201 where at higher concentrations, the diffusive flux of colistin is greater, therefore resulting in less  
202 delay and rapid onset of cell killing. Additionally, at these high concentrations of colistin, all of  
203 the biofilm cells were observed to become nonviable at earlier time points in comparison to  
204 tobramycin, again largely due to drug-treated cells spending less time in transit compartments.

205

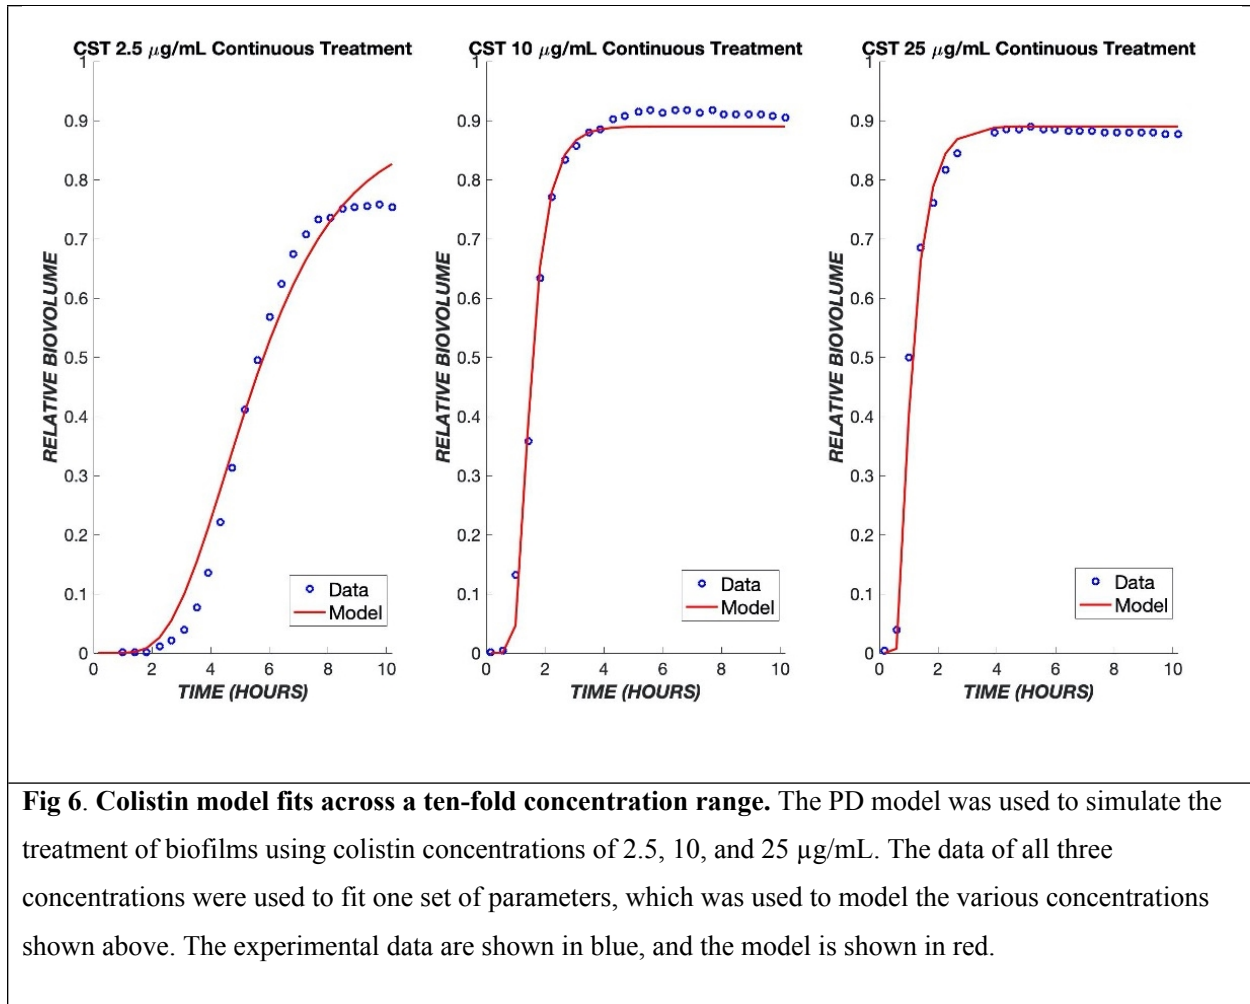

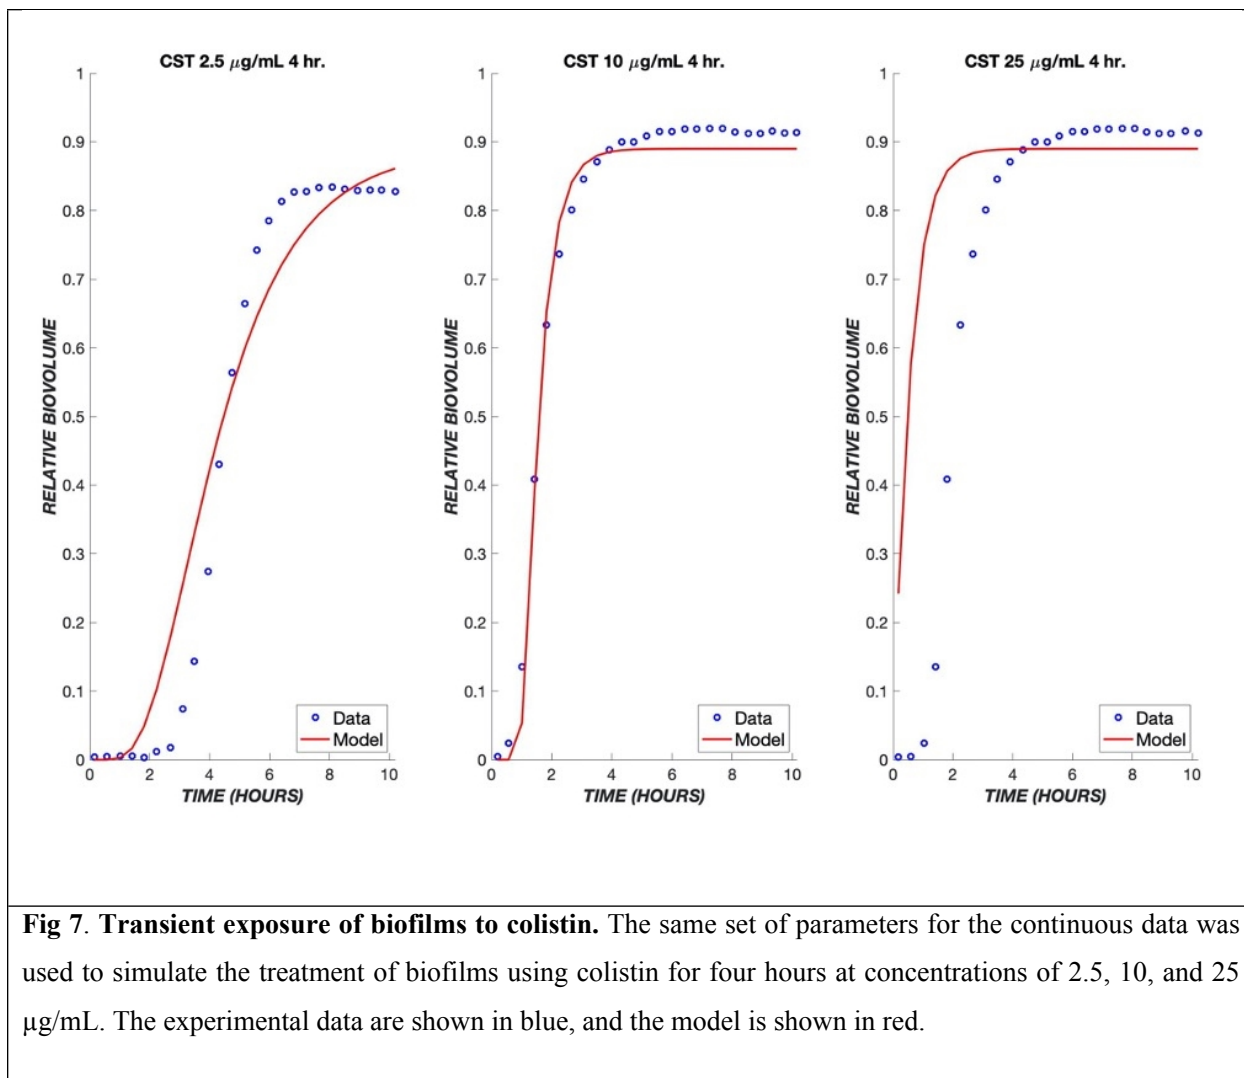

**Fig 7. Transient exposure of biofilms to colistin.** The same set of parameters for the continuous data was used to simulate the treatment of biofilms using colistin for four hours at concentrations of 2.5, 10, and 25 µg/mL. The experimental data are shown in blue, and the model is shown in red.

206

207 Since tobramycin and colistin have different mechanisms of action, they might produce additive  
208 or synergistic effects when used in combination. If there are no strong synergies or antagonisms,  
209 the original model may be able to predict outcomes of combined treatments using only the  
210 parameters determined earlier for each respective drug. The model proposed for this mechanism  
211 involves a combination of both treatments running in parallel (Fig 8A). It proved necessary to add  
212 a path by which the biofilm cells could initially be affected by tobramycin or colistin, and the cells  
213 in transit due to (slower acting) tobramycin exposure could be killed directly by (faster acting)  
214 colistin. It is assumed that cells in a transit compartment due to tobramycin were equally likely as  
215 naïve cells to be affected by colistin; thus, this path does not introduce any additional fitting  
216 parameters into the model. Because of the more rapid killing mechanism of colistin, the response

217 to colistin dominates the experimentally observed and model behaviors (Figure 8B), where the  
 218 biofilm cell death occurs at earlier times, even with lower concentrations of colistin.

219

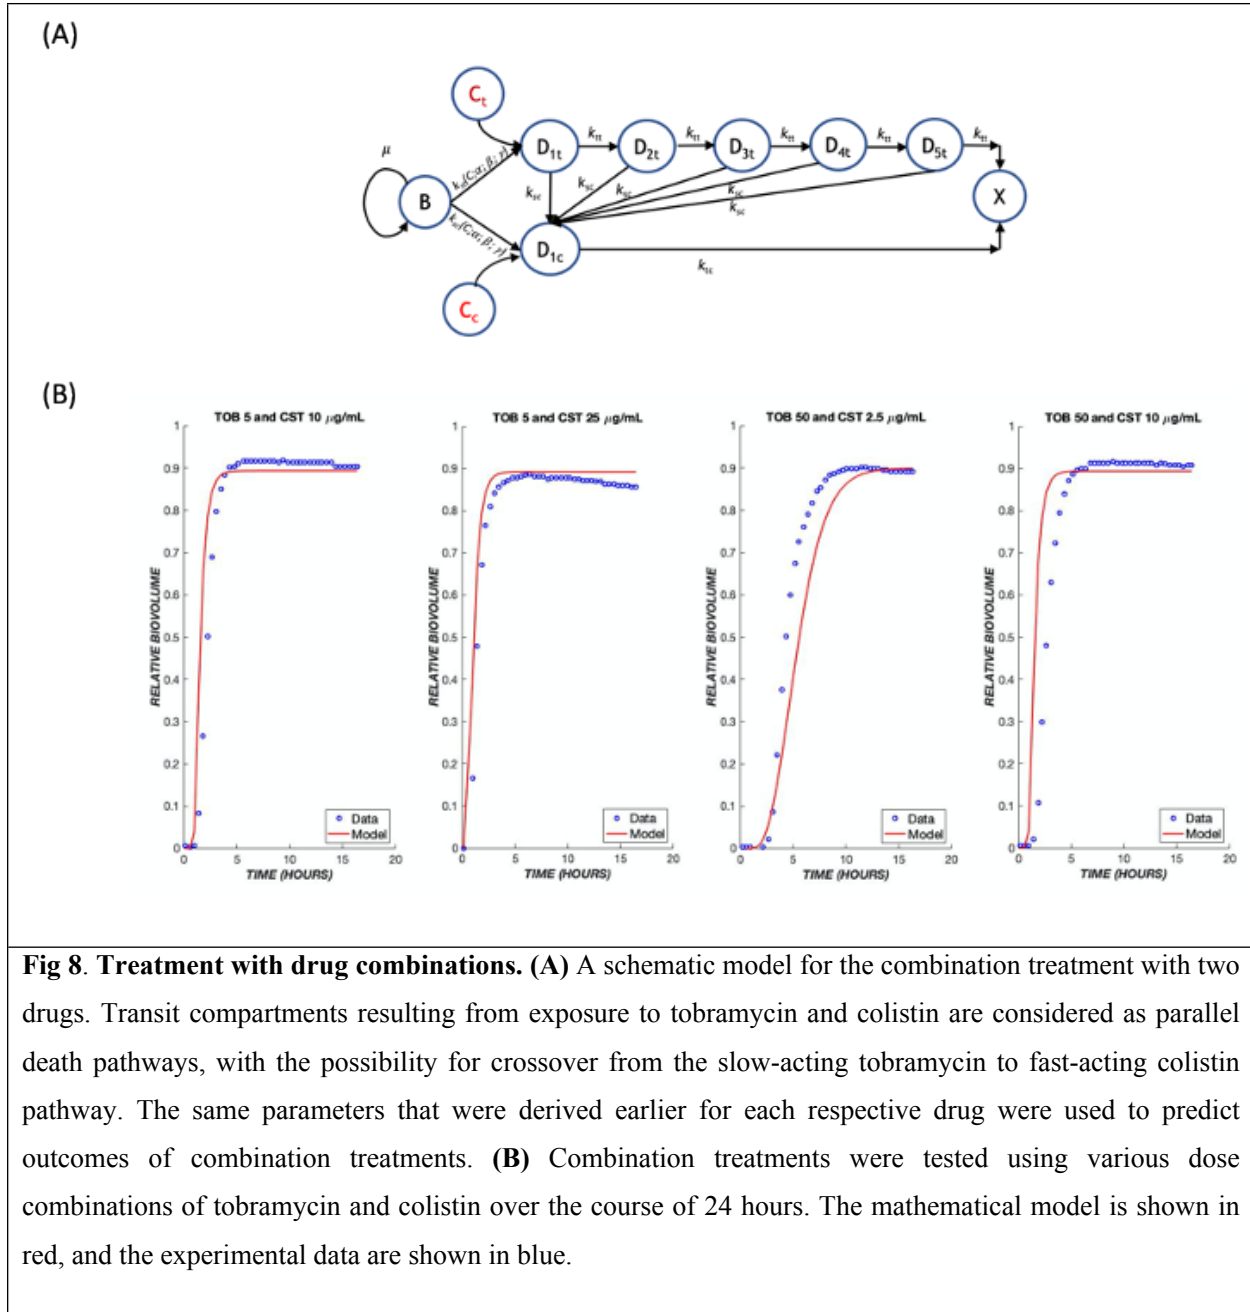

220

## 221 Discussion



222 Bacterial biofilms are a significant problem in human infections because they form communities  
223 that both pose physical barriers to drug transport and allow metabolic adaptations that can alter the  
224 pharmacology of antibiotic treatment [14, 15]. An improved understanding of the response of  
225 biofilm-associated bacteria to antibiotic treatment is needed to optimize the administration route  
226 and timing of existing drugs and to focus efforts on novel antibiotic development. Experimental  
227 datasets wherein the response of a biofilm to treatment is monitored continuously over time  
228 provide a signature of the pharmacologic response. The development of a mathematical model that  
229 captures this response serves as a complementary tool that enables the interpretation of these data  
230 in terms of physicochemical mechanisms.

231 Conventional pharmacologic expressions based on receptor theory are used to describe the  
232 pharmacodynamics (PD) of bacterial response to antibiotics [16, 17]. These in turn are  
233 incorporated into pharmacokinetic-pharmacodynamic (PK-PD) models, which are an important  
234 tool in understanding the dose and time dependence of outcomes in preclinical studies and serve  
235 as the basis for early phase clinical dose and administration scheduling [18, 19]. Traditionally, the  
236 dynamics in PK-PD models of anti-infectives are dictated by the distribution of the drug, and the  
237 concentration dependence is reflected in the pharmacodynamic expression. The simplest such  
238 expression, which is commonly employed in practice, treats the encounter between drug and target  
239 cell as a first-order reaction resulting in instantaneous cell killing [20]. This approach does not  
240 capture important trends observed in preclinical and human infections including a delay between  
241 drug exposure and drug effect and more complex dose response relationships.

242 More elaborate mathematical models have been proposed to describe the growth and treatment of  
243 biofilms, taking into account physical effects such as diffusion of substrate for growth and of  
244 antibiotic for killing within the biofilm, interfacial detachment of biofilm-associated cells,  
245 advection, and chemotaxis [21-24]. Furthermore, additional cellular states that reflect  
246 heterogeneity of response, e.g. persister states [25], or transitional states due to cell damage[26],  
247 have been incorporated. These models promote our quantitative understanding of the role that  
248 these physical and cell physiologic effects can play in the growth and antibiotic treatment of  
249 biofilms. However, incorporation of mechanisms that depend on both space and time involves  
250 partial differential equation-based continuous or agent-based simulation models that do not  
251 incorporate readily into PK-PD models [27, 28]. We sought to develop a model with sufficient

252 mechanistic detail as to describe the dynamics of the biofilm response while still being tractable  
253 for eventual incorporation into a PK-PD framework.

254 Recent experiments that monitor biofilm response dynamically demonstrate that there is a delay  
255 between the onset of drug exposure and cell killing, and that the magnitude of the delay depends  
256 on the particular drug being used [9, 20]. Thus, while diffusion can play a role in the temporal  
257 response, cell physiology and the therapeutic mechanism of action are also evidently important.  
258 Based on these observations, we developed a pharmacodynamic model whose response has two  
259 critical aspects: diffusion of drug through a boundary layer to the cells, and a cell physiological  
260 response in which a cascade of events is initiated whose number and rates can be modified  
261 depending on the mechanism of action of the drug. Specifically, we introduced “transit  
262 compartments” to account for cell states that are affected by drug: non-proliferative, but not yet  
263 dead (Fig 1). Incorporating these elements, the model has five adjustable parameters with distinct  
264 mechanistic interpretations.

265 The parameter  $\mu_B$  represents the specific growth rate of the biofilm. As little cell growth is observed  
266 during the time course of the experiments being modeled, its value is low, and no finer detail needs  
267 to be incorporated. The inclusion of drug diffusion results in two lumped parameters,  $\alpha$  and  $\beta$   
268 (Equation 6 and SI Appendix). The  $\beta$  parameter is the value of  $\frac{\pi D}{H^2}$ , where  $D$  is the diffusion  
269 coefficient, and  $H$  is the thickness of the diffusion layer, which is a combination of the  
270 hydrodynamic layer resulting from the experimental setup in a flow cell, as well as the physical  
271 barrier imposed by the biofilm itself. The lumped parameter  $\beta$  results from the scaling of the  
272 diffusion problem and is the inverse of the characteristic time for diffusion. Using the biofilm  
273 thickness  $\sim 20 \mu\text{m}$ , the fit values of  $\beta$  would correspond to diffusion coefficients ( $1.3 - 5.2 \times 10^{-5}$   
274  $\text{mm}^2/\text{h}$ ). These values are several orders of magnitude lower than those for water [29], suggesting  
275 that the diffusivity of the drugs is reduced in the biofilm and/or there is also a mass transfer  
276 boundary layer [30]. For this reason,  $\beta$  was retained as a fit, rather than fixed, parameter. Since the  
277 boundary layer thickness should be the same for both drugs, the slightly higher value fit for colistin  
278 than for tobramycin can be interpreted as a higher effective diffusion coefficient for the former  
279 compound. Although colistin has a higher molecular weight than tobramycin, it has biosurfactant  
280 properties that may allow it to diffuse (penetrate) more rapidly in the biofilm barrier [31].

281 The  $\alpha$  value is a lumping of  $\frac{k_c D}{H}$ , which includes the aforementioned parameters that describe  
 282 diffusive flux, as well as a rate constant,  $k_c$ , to denote the rate at which biofilm cells are affected  
 283 by the drug and enter into a transit compartment to begin its death cascade. The  $\gamma$  value is a purely  
 284 pharmacodynamic parameter representing cooperativity in terms of the drug binding to and  
 285 poisoning of the biofilm cells. The last parameter,  $k_t$ , corresponds to the intercompartmental transit  
 286 rate of the drug. This is not typically found in other PD models that are designed to capture data at  
 287 one time point; however, it is critical in capturing the overall dynamic behavior of the drug and its  
 288 effect on biofilm killing.

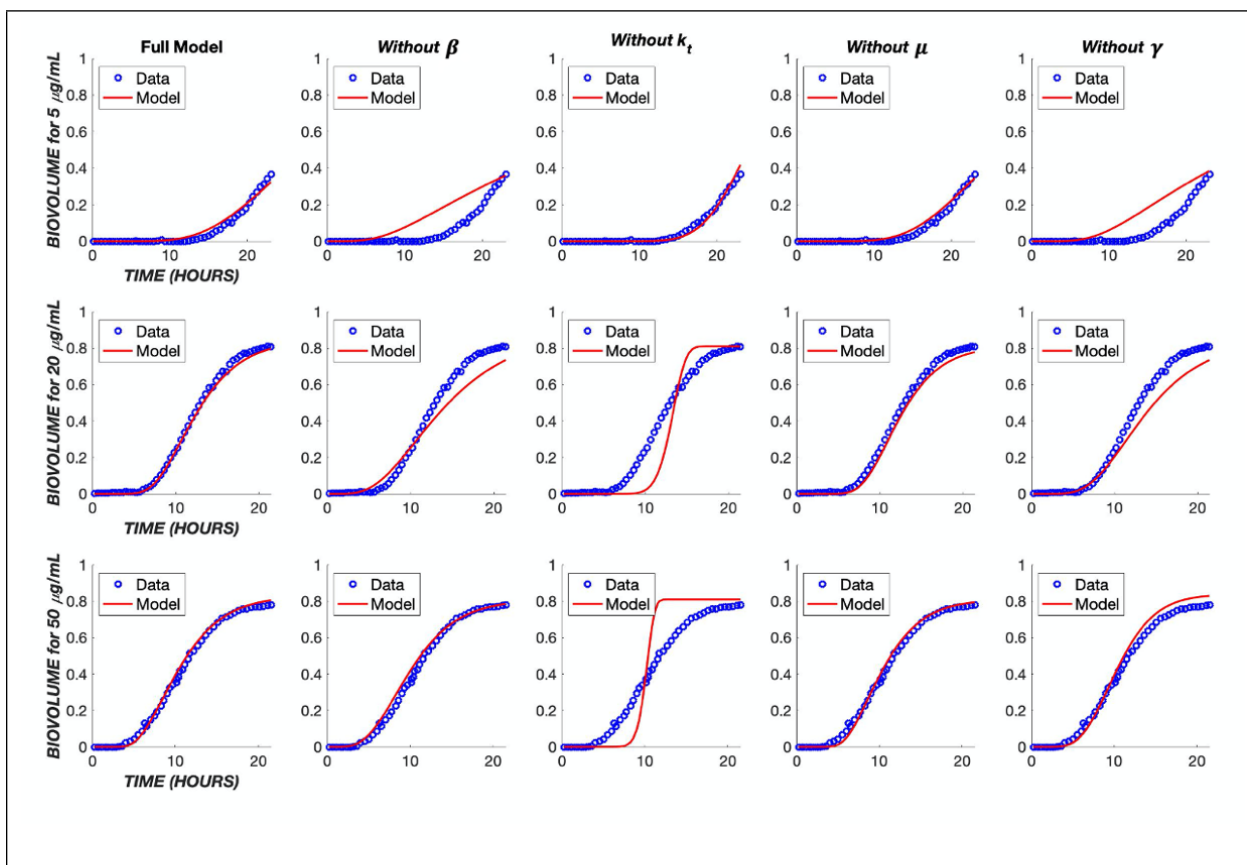

**Fig 9. Impact of model simplifications on performance.** The TOB continuous treatment was used to analyze the parameters within the model. Each TOB concentration was fit to the data without one indicated parameter. The 'Full Model' column shows the fit with the original parameter values found in Table 1.

289

290 In order to better understand the influence of model structure and parameter values on the model  
291 output, several analyses were performed. First, each component of the model was removed in turn  
292 and the model re-fit to the experimental data (Fig 9), with the exception of the cell killing  
293 component ( $\alpha$  parameter), which would give a trivial result. Removal of either the diffusion term  
294 or the transit compartment terms significantly reduced the ability of the model to capture the  
295 dynamics of the biofilm response across the three different concentration levels of tobramycin.  
296 Likewise, removing cooperativity from the model (i.e., constraining the cooperativity parameter,  
297  $\gamma$ , to a value of one) prevented accurate reflection of the concentration dependence. Removal of  
298 bacterial growth,  $\mu$ , did not have a major effect on the model output. However, when neglecting  
299 this parameter in the optimization program, the error between the model and data was increased  
300 by 60% in comparison to incorporating growth rate (Table 2). As a result, the growth rate was  
301 retained in the model.

**Table 2. Impact of removing model components on total error**

|          | Full model | Without $\mu_B$ | Without $\beta$ | Without $\gamma$ | Without $k_t$ |
|----------|------------|-----------------|-----------------|------------------|---------------|
| $\mu_B$  | 0.0321     | -               | 0.5372          | 0.0289           | 0.0000        |
| $\alpha$ | 0.0002     | 0.0012          | 0.0072          | 0.0094           | 0.0351        |
| $\beta$  | 0.2088     | 0.0815          | -               | 0.2480           | 0.0200        |
| $\gamma$ | 3.5330     | 3.2862          | 1.0705          | -                | 3.4315        |
| $k_t$    | 0.5424     | 0.4370          | 0.4228          | 0.8053           | -             |
| Error    | 0.0561     | 0.0971          | 0.4337          | 0.7883           | 1.6449        |

302 The effect of these five parameters on the model output can be further understood through a  
303 parametric sensitivity analysis in which each parameter's value is varied while holding all others  
304 constant (Fig 10). It is evident that variation in the value of  $k_t$  has the greatest impact on the model  
305 overall. Conceptually, this is expected as the intercompartmental transit rate dictates progress  
306 through the “death cascade” as well as the cellular response dynamics to the drug. The value of  $\beta$   
307 dictates the delay due to diffusion between drug administration and cellular effects. It couples with  
308  $k_t$  and has a strong influence on the output. The pharmacologic rate constant,  $\alpha$ , has a modest effect  
309 on the output, while the cooperativity,  $\gamma$ , exerts a stronger influence.

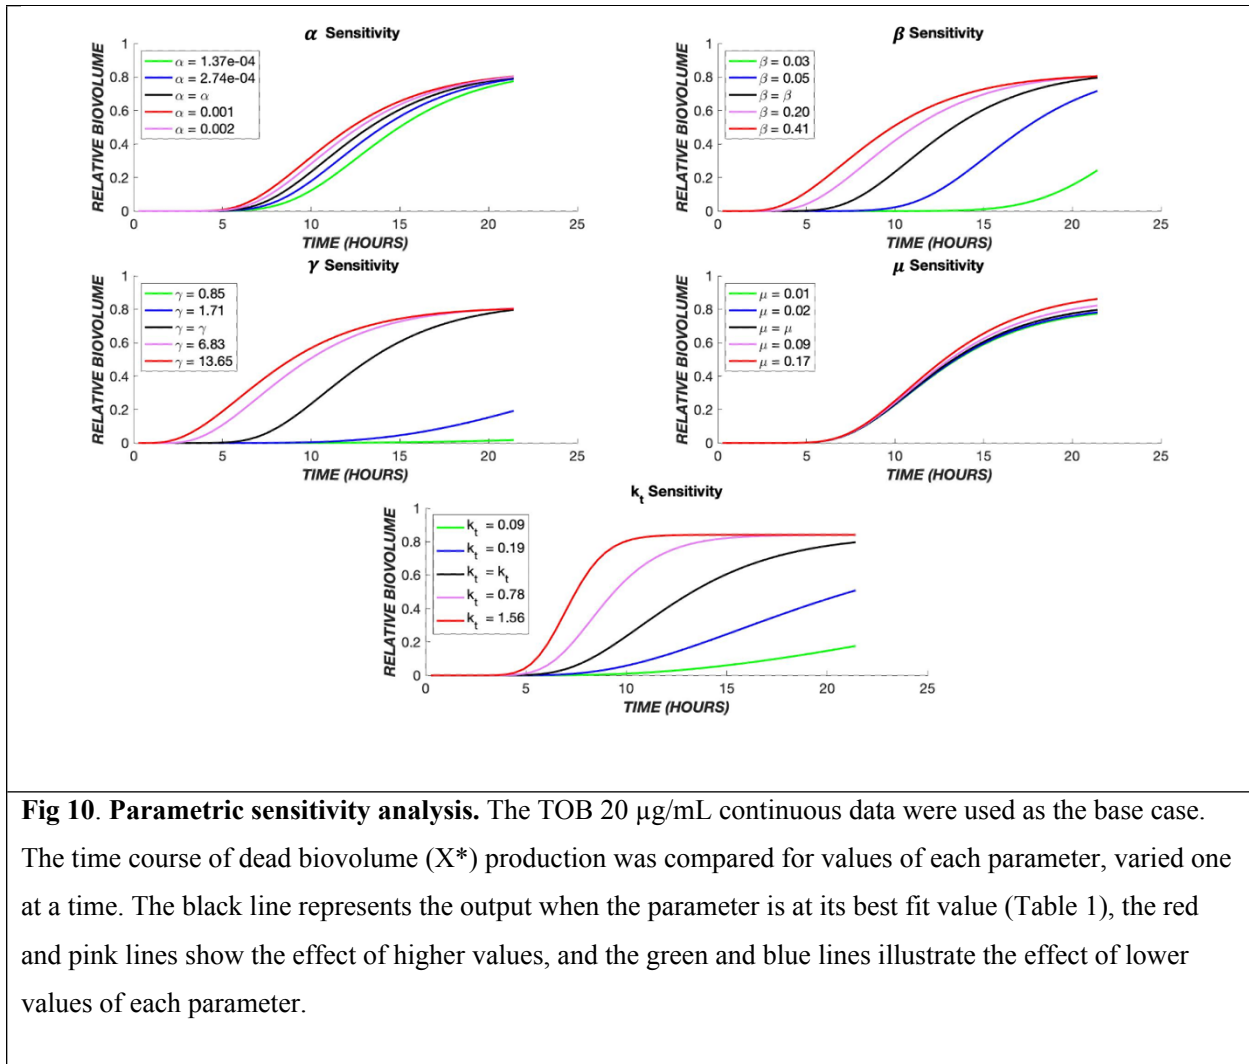

**Fig 10. Parametric sensitivity analysis.** The TOB 20  $\mu\text{g/mL}$  continuous data were used as the base case. The time course of dead biovolume ( $X^*$ ) production was compared for values of each parameter, varied one at a time. The black line represents the output when the parameter is at its best fit value (Table 1), the red and pink lines show the effect of higher values, and the green and blue lines illustrate the effect of lower values of each parameter.

310

311 The number of transit compartments can be considered as an additional model parameter. We  
 312 varied the number systematically, refitting the model each time to determine the value most  
 313 consistent with the experimental data (Fig 11). For colistin treatment, it was found that one  
 314 compartment produces the most accurate model, whereas for tobramycin five compartments  
 315 provides the best fit. For either tobramycin or colistin treatment, as the number of compartments  
 316 increases,  $k_t$  increases in order to mimic the effect of one transit compartment (S1 Table).

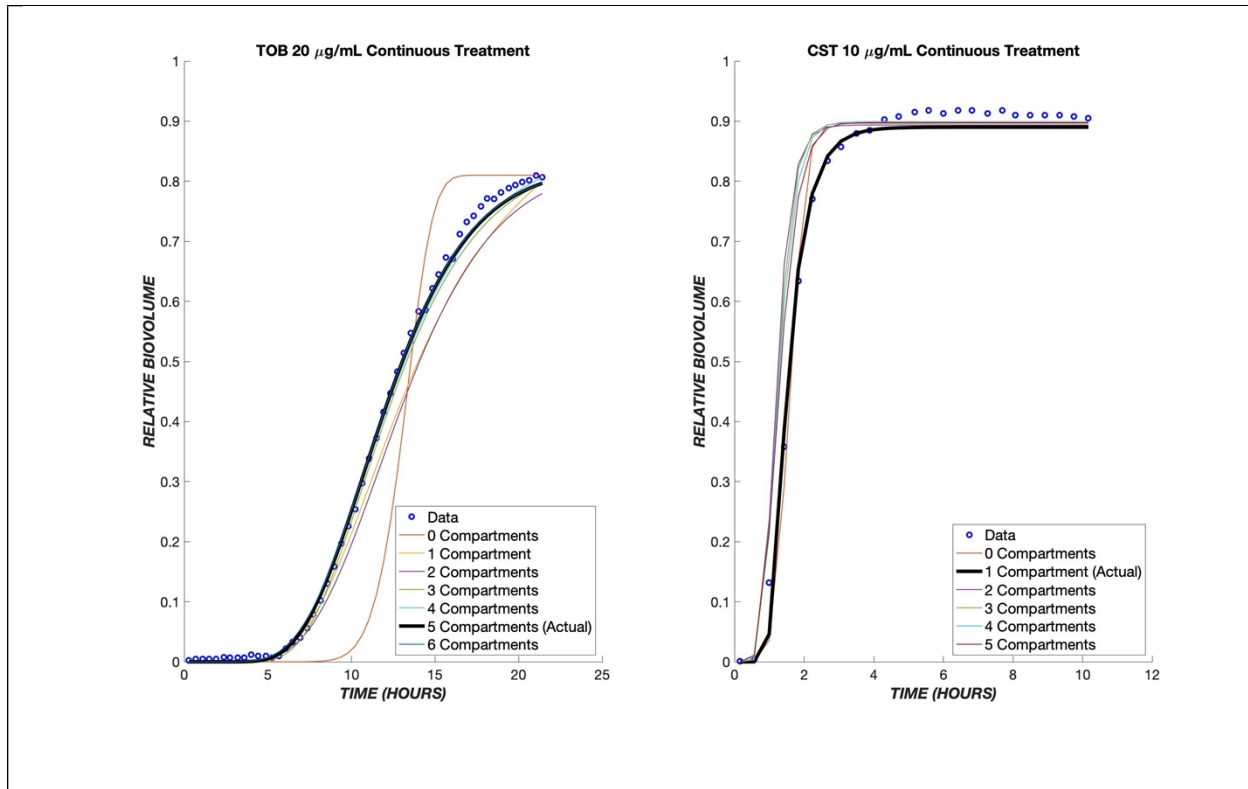

**Fig 11. Optimal number of transit compartments.** The TOB 20  $\mu\text{g/mL}$  and CST 10  $\mu\text{g/mL}$  continuous data were used to determine the ideal number of compartments for the model. On the left graph, the model with three compartments gave the least error between the model and data for tobramycin. The graph on the right shows the model with a differing number of compartments for colistin, and as shown, only one compartment produced the least error between the model and data. The parameter values for each compartment can be found in the tables below.

317

318 The proposed model fit with a single set of parameters for each respective drug was able to  
319 reproduce the response to drug concentrations that vary over an order of magnitude in both  
320 continuous and transient combined exposure (Figs 3, 4, 6, and 7). It is challenging for a model to  
321 capture both concentration (dose) and time effects. The ability of the present model to do so with  
322 a single set of fit parameters is promising. Furthermore, the effect of combined treatment was  
323 captured accurately using parameters for individual drug treatments (Fig 8B).

324

325 Areas where agreement was less robust point to limitations in the model and/or in the  
326 experimental dataset. For instance, in the transient exposure experiments (Fig 4), a reduction in  
327 biovolume (adherent, dead cells) occurred around 20 hours after treatment onset. This represents

328 detachment, which has been incorporated into some biophysical models of biofilm growth [32].  
329 However, it was not considered in the present work, as the physical location of dead cells  
330 (adherent versus detached) is not of great interest in pharmacologic applications. In addition, the  
331 model somewhat underpredicts the extent of cell death throughout the transient experiment. This  
332 underprediction is because the model parameters were fit based on the continuous treatment  
333 experiments (Fig 3), and the rate of cell killing was more rapid during transient exposure, a result  
334 that most likely reflects experimental variation rather than a physical or pharmacologic effect.  
335 Another limitation is that, because experimental data were collected for only 24 hours,  
336 pharmacologic effects occurring at longer times might not be captured accurately in the model.  
337 This would include effects such as regrowth of the biofilm and development of drug resistance,  
338 both of which tend to evolve over longer periods of time.

339  
340 In summary, we have shown that a pharmacodynamic model which integrates diffusion of drug  
341 from the bulk to the cells, drug-cell interactions, and a series of transit compartments for affected  
342 cells is able to describe accurately the dynamics of *Pseudomonas aeruginosa* response to  
343 tobramycin, colistin, and their combinations. The model was fit to an ensemble of data covering  
344 multiple drug concentrations to obtain one set of fit parameters for each drug. Among these, the  
345 specific growth rate proved inconsequential during the time course of the experiments studied, but  
346 each of the other four parameters exerted a distinct influence on the model output and contributed  
347 to its ability to capture experimentally observed dynamics. Overall, the model is robust enough to  
348 show the general behaviors of tobramycin, colistin, and the combination of the two drugs at various  
349 concentrations. This pharmacodynamic model can be paired with a pharmacokinetic description  
350 in vivo to predict the drug's effect on an infection. This could be of potential interest in tissues  
351 such as lung where both systemic and regional (e.g., pulmonary) delivery are possible [33]. Our  
352 model can be useful in simulating effects of different strategies in drug administration and  
353 scheduling to promote better eradication of challenging biofilm infections.

354

## 355 **References**

- 356 1. Donlan RM. Biofilms: microbial life on surfaces. *Emerg Infect Dis.* 2002;8(9):881-90.  
357 Epub 2002/08/27. doi: 10.3201/eid0809.020063. PubMed PMID: 12194761; PubMed Central  
358 PMCID: PMCPMC2732559.
- 359 2. Martinez-Melendez A, Morfin-Otero R, Villarreal-Trevino L, Baines SD, Camacho-Ortiz  
360 A, Garza-Gonzalez E. Analysis of biofilm production and expression of adhesion structures of  
361 circulating *Clostridioides difficile* strains from Mexico. *Enferm Infecc Microbiol Clin (Engl Ed).*  
362 2021. Epub 2021/03/15. doi: 10.1016/j.eimc.2021.01.017. PubMed PMID: 33714640.
- 363 3. Rabin N, Zheng Y, Opoku-Temeng C, Du Y, Bonsu E, Sintim HO. Biofilm formation  
364 mechanisms and targets for developing antibiofilm agents. *Future Med Chem.* 2015;7(4):493-  
365 512. Epub 2015/04/16. doi: 10.4155/fmc.15.6. PubMed PMID: 25875875.
- 366 4. Ehre C, Ridley C, Thornton DJ. Cystic fibrosis: an inherited disease affecting mucin-  
367 producing organs. *Int J Biochem Cell Biol.* 2014;52:136-45. Epub 2014/04/02. doi:  
368 10.1016/j.biocel.2014.03.011. PubMed PMID: 24685676; PubMed Central PMCID:  
369 PMCPMC4449140.
- 370 5. Khatoon Z, McTiernan CD, Suuronen EJ, Mah TF, Alarcon EI. Bacterial biofilm  
371 formation on implantable devices and approaches to its treatment and prevention. *Heliyon.*  
372 2018;4(12):e01067. Epub 2019/01/09. doi: 10.1016/j.heliyon.2018.e01067. PubMed PMID:  
373 30619958; PubMed Central PMCID: PMCPMC6312881.
- 374 6. Krajewski J, Bode-Boger SM, Troger U, Martens-Lobenhoffer J, Mulrooney T,  
375 Mittelstadt H, et al. Successful treatment of extensively drug-resistant *Pseudomonas aeruginosa*  
376 osteomyelitis using a colistin- and tobramycin-impregnated PMMA spacer. *Int J Antimicrob*  
377 *Agents.* 2014;44(4):363-6. Epub 2014/09/04. doi: 10.1016/j.ijantimicag.2014.05.023. PubMed  
378 PMID: 25182711.



- 379 7. Kaiser P, Wachter J, Windbergs M. Therapy of infected wounds: overcoming clinical  
380 challenges by advanced drug delivery systems. *Drug Deliv Transl Res*. 2021. Epub 2021/02/22.  
381 doi: 10.1007/s13346-021-00932-7. PubMed PMID: 33611768.
- 382 8. Mouton JW, Jacobs N, Tiddens H, Horrevorts AM. Pharmacodynamics of tobramycin in  
383 patients with cystic fibrosis. *Diagn Microbiol Infect Dis*. 2005;52(2):123-7. Epub 2005/06/21.  
384 doi: 10.1016/j.diagmicrobio.2005.02.011. PubMed PMID: 15964500.
- 385 9. Musken M, Pawar V, Schwebs T, Bahre H, Felgner S, Weiss S, et al. Breaking the  
386 Vicious Cycle of Antibiotic Killing and Regrowth of Biofilm-Residing *Pseudomonas aeruginosa*.  
387 *Antimicrob Agents Chemother*. 2018;62(12). Epub 2018/10/10. doi: 10.1128/AAC.01635-18.  
388 PubMed PMID: 30297365; PubMed Central PMCID: PMC6256772.
- 389 10. Lawrence JR, Neu TR. Confocal laser scanning microscopy for analysis of microbial  
390 biofilms. *Methods Enzymol*. 1999;310:131-44. Epub 1999/11/05. doi: 10.1016/s0076-  
391 6879(99)10011-9. PubMed PMID: 10547787.
- 392 11. Wood SR, Kirkham J, Marsh PD, Shore RC, Nattress B, Robinson C. Architecture of  
393 intact natural human plaque biofilms studied by confocal laser scanning microscopy. *J Dent Res*.  
394 2000;79(1):21-7. Epub 2000/02/26. doi: 10.1177/00220345000790010201. PubMed PMID:  
395 10690656.
- 396 12. Moustafa DA, Wu AW, Zamora D, Daly SM, Sturge CR, Pybus C, et al. Peptide-  
397 Conjugated Phosphorodiamidate Morpholino Oligomers Retain Activity against Multidrug-  
398 Resistant *Pseudomonas aeruginosa* In Vitro and In Vivo. *mBio*. 2021;12(1). Epub 2021/01/14.  
399 doi: 10.1128/mBio.02411-20. PubMed PMID: 33436433; PubMed Central PMCID:  
400 PMCPMC7844538.

- 401 13. Chamoun S, Welander J, Martis-Thiele MM, Ntzouni M, Claesson C, Vikstrom E, et al.  
402 Colistin Dependence in Extensively Drug-Resistant *Acinetobacter baumannii* Strain Is  
403 Associated with ISA<sub>jo2</sub> and ISA<sub>ba13</sub> Insertions and Multiple Cellular Responses. *Int J Mol Sci.*  
404 2021;22(2). Epub 2021/01/13. doi: 10.3390/ijms22020576. PubMed PMID: 33430070; PubMed  
405 Central PMCID: PMCPMC7827689.
- 406 14. Angeles-Martinez L, Hatzimanikatis V. Spatio-temporal modeling of the crowding  
407 conditions and metabolic variability in microbial communities. *PLoS Comput Biol.*  
408 2021;17(7):e1009140. Epub 2021/07/23. doi: 10.1371/journal.pcbi.1009140. PubMed PMID:  
409 34292935; PubMed Central PMCID: PMCPMC8297787.
- 410 15. Martin C, Low WL, Gupta A, Amin MC, Radecka I, Britland ST, et al. Strategies for  
411 antimicrobial drug delivery to biofilm. *Curr Pharm Des.* 2015;21(1):43-66. Epub 2014/09/06.  
412 doi: 10.2174/1381612820666140905123529. PubMed PMID: 25189862.
- 413 16. Jung WJ, Park JH, Goo S, Chae JW, Kim J, Shin S, et al. Dose Optimization of  
414 Vancomycin Using a Mechanism-based Exposure-Response Model in Pediatric Infectious  
415 Disease Patients. *Clin Ther.* 2021;43(1):185-94 e16. Epub 2020/12/29. doi:  
416 10.1016/j.clinthera.2020.10.016. PubMed PMID: 33358258.
- 417 17. Wen X, Gehring R, Stallbaumer A, Riviere JE, Volkova VV. Limitations of MIC as sole  
418 metric of pharmacodynamic response across the range of antimicrobial susceptibilities within a  
419 single bacterial species. *Sci Rep.* 2016;6:37907. Epub 2016/12/03. doi: 10.1038/srep37907.  
420 PubMed PMID: 27905408; PubMed Central PMCID: PMCPMC5131373.
- 421 18. Danhof M, de Lange EC, Della Pasqua OE, Ploeger BA, Voskuyl RA. Mechanism-based  
422 pharmacokinetic-pharmacodynamic (PK-PD) modeling in translational drug research. *Trends*

- 423 Pharmacol Sci. 2008;29(4):186-91. Epub 2008/03/21. doi: 10.1016/j.tips.2008.01.007. PubMed  
424 PMID: 18353445.
- 425 19. Rajman I. PK/PD modelling and simulations: utility in drug development. Drug Discov  
426 Today. 2008;13(7-8):341-6. Epub 2008/04/15. doi: 10.1016/j.drudis.2008.01.003. PubMed  
427 PMID: 18405847.
- 428 20. Haagensen J, Verotta D, Huang L, Engel J, Spormann AM, Yang K. Spatiotemporal  
429 pharmacodynamics of meropenem- and tobramycin-treated *Pseudomonas aeruginosa* biofilms. J  
430 Antimicrob Chemother. 2017;72(12):3357-65. Epub 2017/09/30. doi: 10.1093/jac/dkx288.  
431 PubMed PMID: 28961810; PubMed Central PMCID: PMC5890705.
- 432 21. Stewart PS. Biofilm accumulation model that predicts antibiotic resistance of  
433 *Pseudomonas aeruginosa* biofilms. Antimicrob Agents Chemother. 1994;38(5):1052-8. Epub  
434 1994/05/01. doi: 10.1128/AAC.38.5.1052. PubMed PMID: 8067737; PubMed Central PMCID:  
435 PMCPMC188149.
- 436 22. Stewart PS, White B, Boegli L, Hamerly T, Williamson KS, Franklin MJ, et al.  
437 Conceptual Model of Biofilm Antibiotic Tolerance That Integrates Phenomena of Diffusion,  
438 Metabolism, Gene Expression, and Physiology. J Bacteriol. 2019;201(22). Epub 2019/09/11. doi:  
439 10.1128/JB.00307-19. PubMed PMID: 31501280; PubMed Central PMCID: PMC6805107.
- 440 23. Stewart PS, Zhang T, Xu R, Pitts B, Walters MC, Roe F, et al. Reaction-diffusion theory  
441 explains hypoxia and heterogeneous growth within microbial biofilms associated with chronic  
442 infections. NPJ Biofilms Microbiomes. 2016;2:16012. Epub 2017/07/20. doi:  
443 10.1038/npjbiofilms.2016.12. PubMed PMID: 28721248; PubMed Central PMCID:  
444 PMCPMC5515263.

- 445 24. Sheraton MV, Yam JKH, Tan CH, Oh HS, Mancini E, Yang L, et al. Mesoscopic Energy  
446 Minimization Drives *Pseudomonas aeruginosa* Biofilm Morphologies and Consequent  
447 Stratification of Antibiotic Activity Based on Cell Metabolism. *Antimicrob Agents Chemother.*  
448 2018;62(5). Epub 2018/02/22. doi: 10.1128/AAC.02544-17. PubMed PMID: 29463543; PubMed  
449 Central PMCID: PMC5923133.
- 450 25. Cogan NG, Szomolay B, Dindos M. Effect of periodic disinfection on persisters in a one-  
451 dimensional biofilm model. *Bull Math Biol.* 2013;75(1):94-123. Epub 2013/01/09. doi:  
452 10.1007/s11538-012-9796-z. PubMed PMID: 23296996.
- 453 26. Roberts ME, Stewart PS. Modeling antibiotic tolerance in biofilms by accounting for  
454 nutrient limitation. *Antimicrob Agents Chemother.* 2004;48(1):48-52. Epub 2003/12/25. doi:  
455 10.1128/AAC.48.1.48-52.2004. PubMed PMID: 14693517; PubMed Central PMCID:  
456 PMCPMC310152.
- 457 27. Kindler O, Pulkkinen O, Cherstvy AG, Metzler R. Burst statistics in an early biofilm  
458 quorum sensing model: the role of spatial colony-growth heterogeneity. *Sci Rep.*  
459 2019;9(1):12077. Epub 2019/08/21. doi: 10.1038/s41598-019-48525-2. PubMed PMID:  
460 31427659; PubMed Central PMCID: PMC6700081.
- 461 28. Mattei MR, Frunzo L, D'Acunto B, Pechaud Y, Pirozzi F, Esposito G. Continuum and  
462 discrete approach in modeling biofilm development and structure: a review. *J Math Biol.*  
463 2018;76(4):945-1003. Epub 2017/07/26. doi: 10.1007/s00285-017-1165-y. PubMed PMID:  
464 28741178.
- 465 29. Nichols WW, Dorrington SM, Slack MP, Walmsley HL. Inhibition of tobramycin  
466 diffusion by binding to alginate. *Antimicrob Agents Chemother.* 1988;32(4):518-23. Epub

- 467 1988/04/01. doi: 10.1128/AAC.32.4.518. PubMed PMID: 3132093; PubMed Central PMCID:  
468 PMCPMC172213.
- 469 30. Stewart PS. Diffusion in biofilms. *J Bacteriol.* 2003;185(5):1485-91. Epub 2003/02/20.  
470 doi: 10.1128/JB.185.5.1485-1491.2003. PubMed PMID: 12591863; PubMed Central PMCID:  
471 PMCPMC148055.
- 472 31. Banat IM, De Rienzo MA, Quinn GA. Microbial biofilms: biosurfactants as antibiofilm  
473 agents. *Appl Microbiol Biotechnol.* 2014;98(24):9915-29. Epub 2014/11/02. doi:  
474 10.1007/s00253-014-6169-6. PubMed PMID: 25359476.
- 475 32. Stewart PS. A model of biofilm detachment. *Biotechnol Bioeng.* 1993;41(1):111-7. Epub  
476 1993/01/05. doi: 10.1002/bit.260410115. PubMed PMID: 18601252.
- 477 33. Sou T, Kukavica-Ibrulj I, Soukarieh F, Halliday N, Levesque RC, Williams P, et al.  
478 Model-Based Drug Development in Pulmonary Delivery: Pharmacokinetic Analysis of Novel  
479 Drug Candidates for Treatment of *Pseudomonas aeruginosa* Lung Infection. *J Pharm Sci.*  
480 2019;108(1):630-40. Epub 2018/09/27. doi: 10.1016/j.xphs.2018.09.017. PubMed PMID:  
481 30257195; PubMed Central PMCID: PMCPMC6307981.

482

## 483 **Supplementary information**

484 **S1 Appendix. Diffusive flux to biofilm cells.**

485 **S1 Table: Effect of transit compartment number on error.**
